# Supplementary material for: Dissecting charge relaxation pathways in CdSe/CdS nanocrystals using femtosecond two-dimensional electronic spectroscopy
Source: Royal Society of Chemistry journal article supplement (doi:10.1039/c7nr00654c), 2017-01-01
Supplement: c7nr00654c1.pdf [file c7nr00654c1.pdf]

## Supporting Information

# Dissecting Charge Relaxation Pathways in CdSe/CdS Nanocrystals Using Femtosecond Two- Dimensional Electronic Spectroscopy

*J. W. Jarrett,<sup>a</sup> C. Yi,<sup>a</sup> T. Stoll,<sup>b</sup> J. Rehaut,<sup>b,c</sup> A. Oriana,<sup>b,d</sup> F. Branchi,<sup>2</sup> G. Cerullo,<sup>2</sup> and K. L.*

*Knappenberger, Jr.<sup>a,b,e\*</sup>*

<sup>a</sup>Department of Chemistry and Biochemistry, Florida State University, Tallahassee, Florida  
32306-4390, United States

<sup>b</sup>IFN-CNR, Dipartimento di Fisica, Politecnico di Milano, Piazza Leonardo da Vinci 32, 20133  
Milano, Italy

<sup>c</sup>Paul Scherrer Institute, CH-4232 Villigen PSI, Switzerland

<sup>d</sup>Laboratoire de Spectroscopie Ultrarapide, EPFL, CH-1015 Lausanne, Switzerland

<sup>e</sup>National High Magnetic Field Laboratory, 1800 E. Paul Dirac Drive, Tallahassee, Florida 32310-  
4005, United States

### Table of Contents

|                                                                                 |          |
|---------------------------------------------------------------------------------|----------|
| <b>S1. Experimental Setup for Two-Dimensional Electronic Spectroscopy .....</b> | <b>2</b> |
| <b>S2. Data Fitting Procedure.....</b>                                          | <b>4</b> |
| <b>S3. Additional Figures .....</b>                                             | <b>5</b> |
| <b>References: .....</b>                                                        | <b>7</b> |

## S1. Experimental Setup for Two-Dimensional Electronic Spectroscopy

Figure S1 depicts the experimental setup for two-dimensional electronic spectroscopy (2DES) measurements in the visible. The optical layout and procedure for acquiring femtosecond 2DES data has been previously described in detail.<sup>1</sup> The Translating-Wedge-Based Identical Pulses eNcoding System (TWINS)<sup>1, 2</sup> is used to generate a time-delayed ( $t_1$ ), phase-locked excitation pulse pair that is used to create the pump frequency axis. The  $t_1$  calibration and phasing procedures used to generate the 2DES maps in the main text have been described previously.<sup>1</sup>

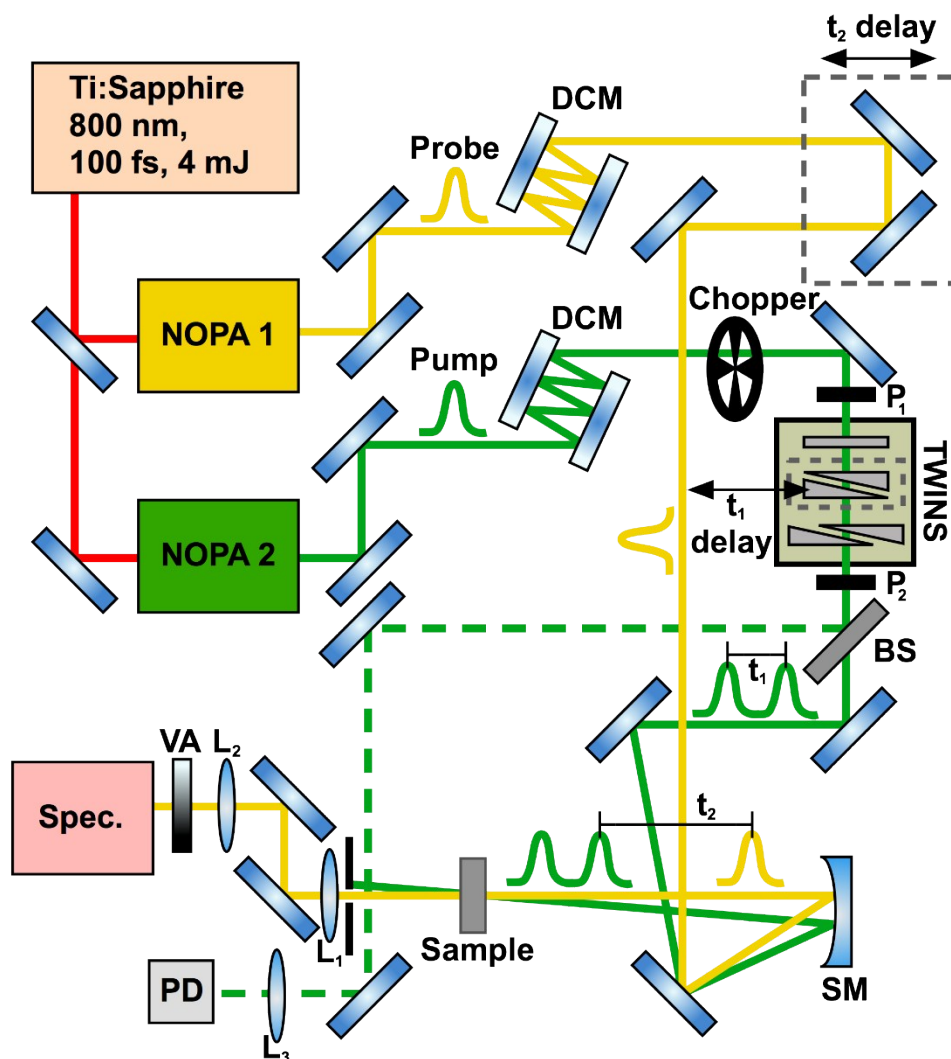

**Figure S1.** Optical layout for femtosecond time-resolved 2DES. Components include: NOPA: Noncollinear Optical Parametric Amplifier; DCM: Double Chirped Mirror; TWINS: Translating Wedge-based Identical Pulses eNcoding System;  $P_N$ : Linear Polarizer; BS: Beam Splitter; SM:

Spherical Mirror,  $f = 125$  mm;  $L_N$ : Converging Lens; VA: Variable Attenuator; Spec.: spectrometer

An amplified Ti:sapphire laser system (Libra, Coherent) delivering 4-mJ, 100-fs pulses centered at 800 nm at a 1-kHz repetition rate was used to seed two synchronized non-collinear optical amplifiers (NOPAs), each one pumped with 300  $\mu$ J of energy, which served as the pump and probe arms of the 2DES setup. One NOPA delivered visible pump pulses spanning 1.8 eV to 2.4 eV, while the other delivered visible probe pulses spanning 1.7 eV to 2.3 eV. The outputs from both NOPAs were compressed to sub-20-fs duration by multiple reflections on custom-designed double-chirped mirrors (DCMs). The waiting time,  $t_2$ , between pump and probe lines was delayed using a conventional translation stage, and the time delay between the excitation pulse pair,  $t_1$ , was generated by the TWINS setup. Possible  $t_2$  delays ranged from -150 fs to 10 ps, with step sizes as small as 10 fs. The  $t_1$  delays can be set from  $\sim$ 10 as to 500 fs. A portion of the pump beam is directed from the pump propagation path to a photodiode to monitor the  $t_1$  interferogram of the pump pulse pair, and this information is used to determine time zero and phase the 2DES spectra. The pump and probe pulses are non-collinearly focused into a 200- $\mu$ m pathlength cuvette of sample with spot sizes of 110  $\mu$ m and 100  $\mu$ m, respectively, and the transmitted probe light was dispersed on a spectrometer. The  $t_1$  time delays were rapidly scanned, which allowed for a typical 2DES map at a single  $t_2$  delay to be acquired in less than 10 seconds. The measurement across all  $t_2$  delay times was repeated multiple times and averaged until satisfactory data quality was achieved.

Dispersion introduced to the pump pulse replicas by the TWINS optics was compensated by a suitable number of reflections on a DCM pair, and spectral phase correction was verified using a Spatially Encoded Arrangement for Temporal Analysis by Dispersing a Pair Of Light E-fields (SEA-TADPOLE) setup.<sup>3</sup>

## S2. Data Fitting Procedure

Dynamics traces were extracted from 2D maps at specified excitation-detection energies at each  $t_2$  pump-probe delay. These data were fit with an in-house program that uses an iterative least-squares approach to fit the data with the following equation:

$$S(t) = g(t) \otimes \left( \sum_i A_i \exp(-t / \tau_i) + A_{\text{inf}} \right)$$

Where the symbol  $\otimes$  stands for convolution and  $g(t)$  is the instrument response function (IRF), i.e. the cross-correlation of Gaussian pump and probe laser pulses,  $A_i$  is the amplitude coefficient of the  $i^{\text{th}}$  component,  $\tau_i$  is the time constant of the  $i^{\text{th}}$  component, and  $A_{\text{inf}}$  is a non-decaying plateau function. Since the decay of the transient bleach in these semiconductor nanocrystals persists for much longer than the possible  $t_2$  durations available, the dynamics data in this study were treated with a single exponential function ( $i = 1$ ) to determine the growth component and a constant non-decaying plateau function.

### S3. Additional Figures

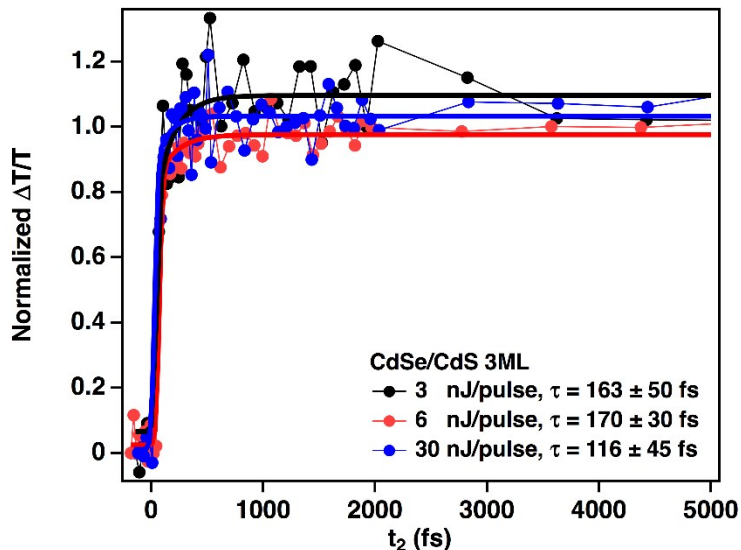

**Figure S2.** Extracted  $t_2$  time-dependent signal amplitudes acquired from band-edge detection (Excitation Energy 2.26 eV, Detection Energy 2.08 eV) of CdSe/CdS core/shell nanocrystals with three monolayers of CdS at various excitation pulse energies. Data were fit to a single exponential growth with a time constant of  $\sim 150$  fs, regardless of pulse energy.

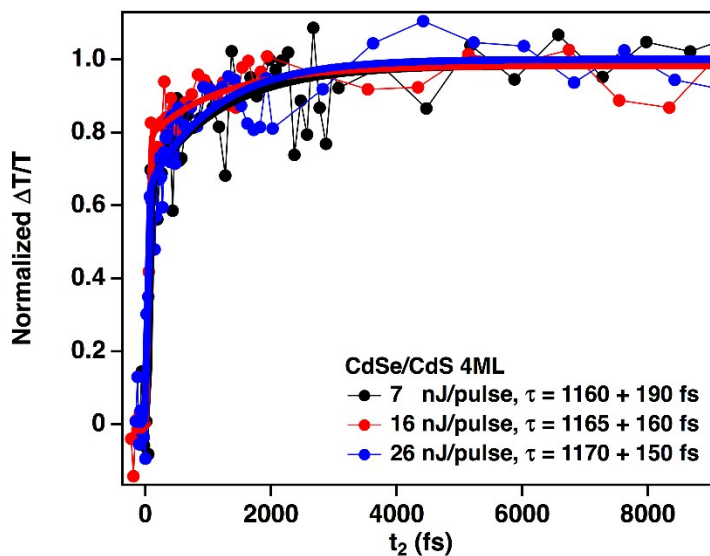

**Figure S3.** Extracted  $t_2$  time-dependent signal amplitudes acquired from band-edge detection (Excitation Energy 2.26 eV, Detection Energy 2.08 eV) of CdSe/CdS core/shell nanocrystals with four monolayers of CdS at various excitation pulse energies. Data were fit to a single exponential growth with a time constant of  $\sim 1160$  fs, regardless of pulse energy.

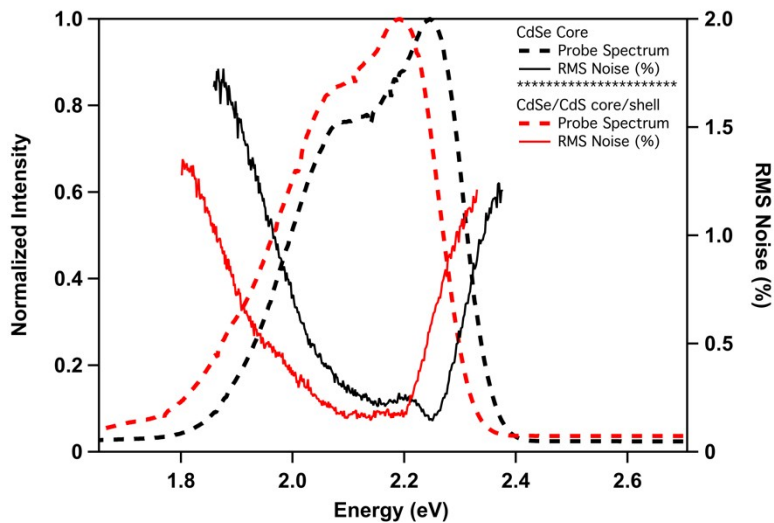

**Figure S4.** Probe laser spectra (dashed lines) and RMS noise (solid lines) used for 2DES on CdSe cores (black) and CdSe/CdS core/shell particles (red). The NOPA was tuned to lower energy for the core/shell particles in order to reduce noise at the red-shifted bandgap energy region.

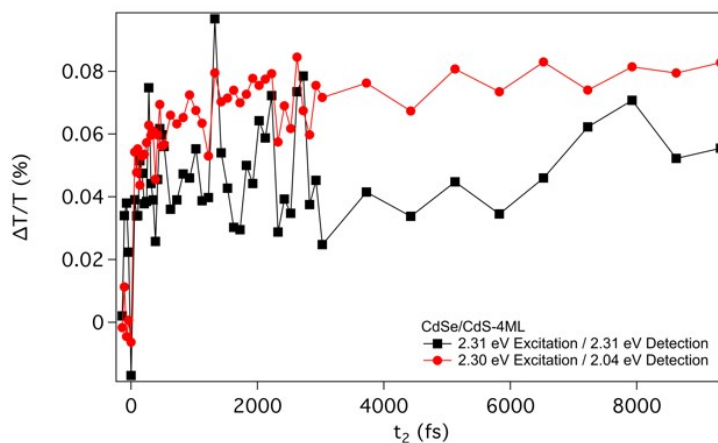

**Figure S5.** Extracted  $t_2$  time-dependent signal amplitudes acquired from band-edge detection (red trace) and 2.31 eV/2.31 eV excitation/detection (black trace) of CdSe/CdS core/shell nanocrystals with four monolayers of CdS. Although there was non-decaying transient signal on the 2.31 eV diagonal, the noise level was very high because it falls at the high-energy range of the probe laser spectrum (see Figure S4).

## References:

1. Rehault, J.; Maiuri, M.; Oriana, A.; Cerullo, G. *Rev. Sci. Instrum.* **2014**, 85, (12), 10.
2. Maiuri, M.; Rehault, J.; Carey, A. M.; Hacking, K.; Garavelli, M.; Luer, L.; Polli, D.; Cogdell, R. J.; Cerullo, G. *J. Chem. Phys.* **2015**, 142, (21), 10.
3. Bowlan, P.; Gabolde, P.; Shreenath, A.; McGresham, K.; Trebino, R.; Akturk, S. *Opt. Express* **2006**, 14, (24), 11892-11900.
